# Supplementary material
Source: MDPI journal article supplement (https://www.mdpi.com/2673-6209/3/4/38)
Supplement: s1 [file s1]

**Supporting Information to Accompany:**

# **Thermal and Mechanical Properties of Guaiacol-Fatty Acid-Sulfur Composites**

**Charini P. Maladeniya, Nawoda L. Kapuge Dona, Ashlyn D. Smith, and Rhett C. Smith\***

Department of Chemistry and Center for Optical Materials Science and Engineering Technology, Clemson University, Clemson, SC 29634, USA.

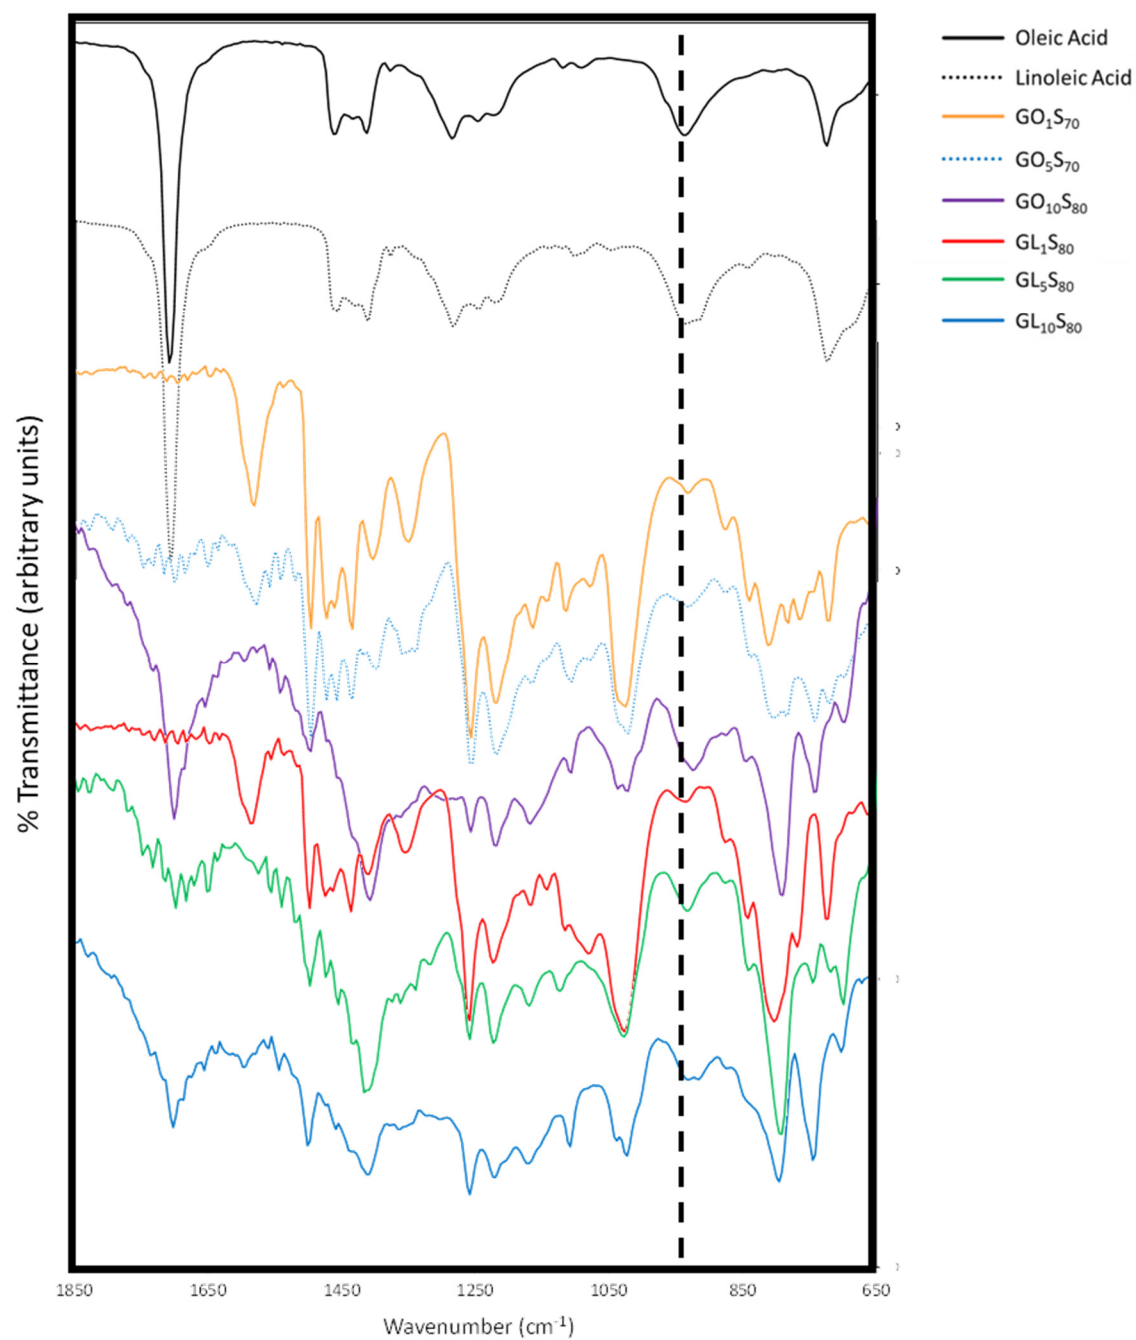

**Figure S1. A)** Region from 650–1850  $\text{cm}^{-1}$  of the FTIR spectra of composites.

A)

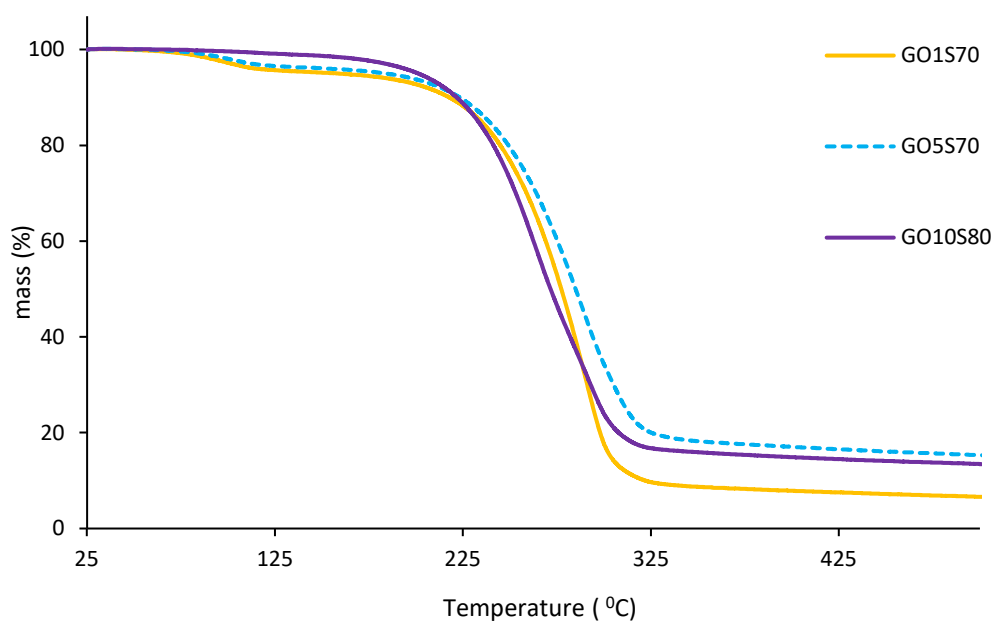

B)

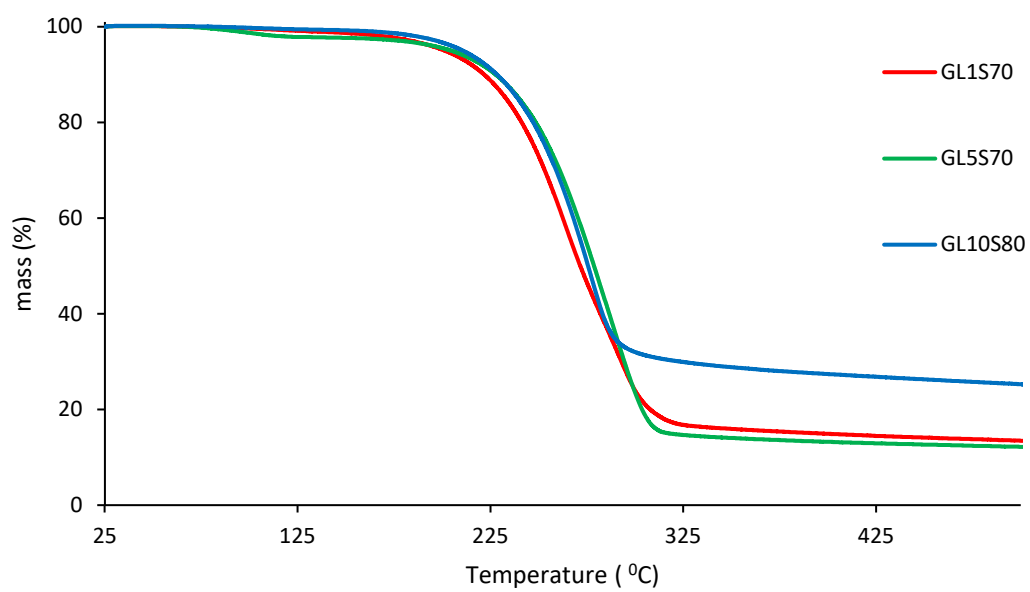

**Figure S2.** TGA traces for GO<sub>x</sub>S<sub>y</sub> (A) and GL<sub>x</sub>S<sub>y</sub> (B).

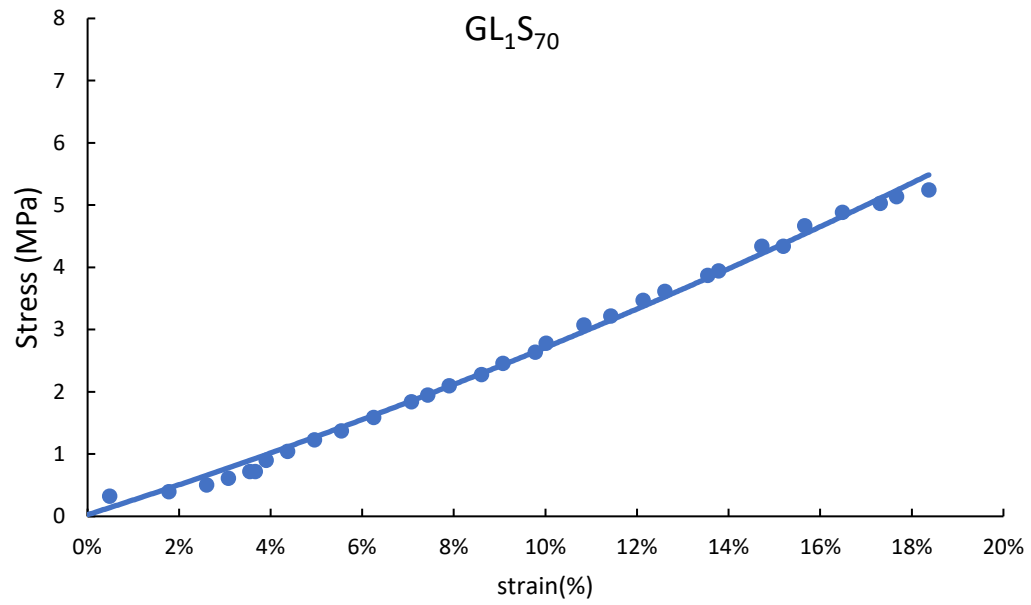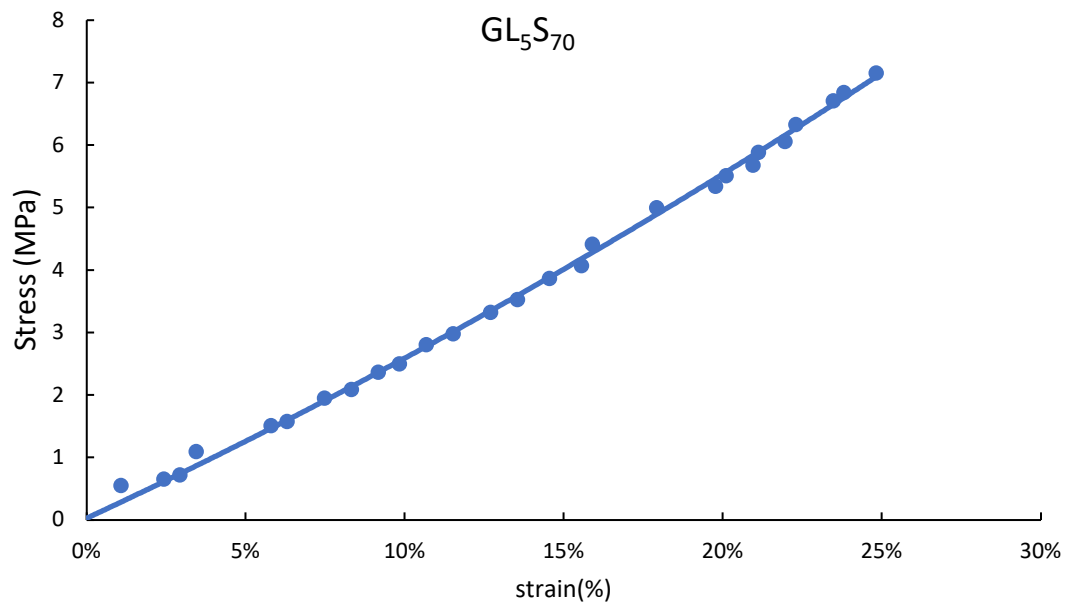

(Cont'd)

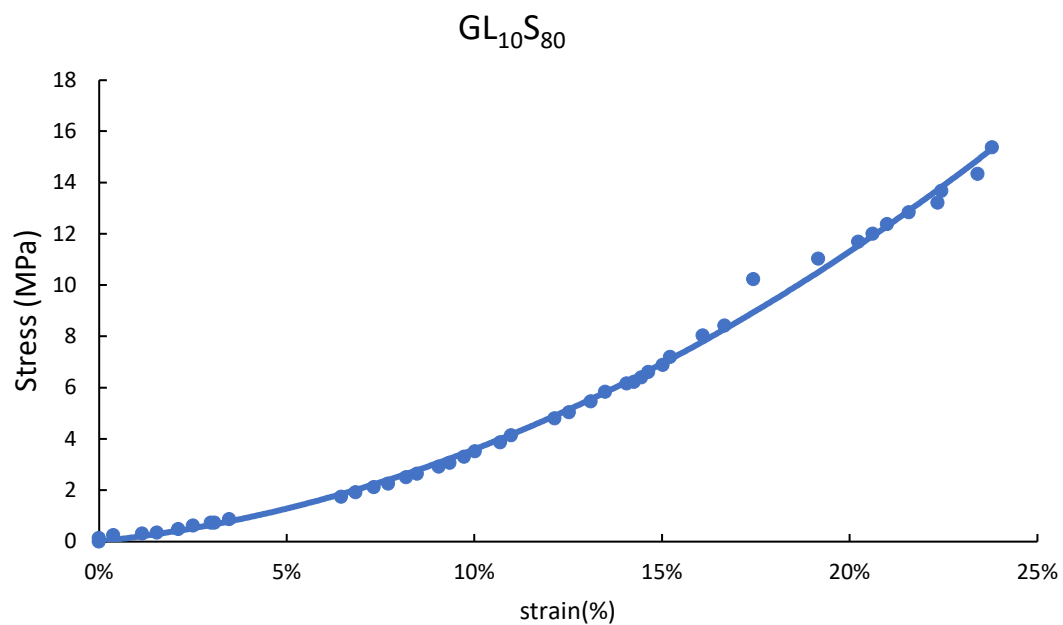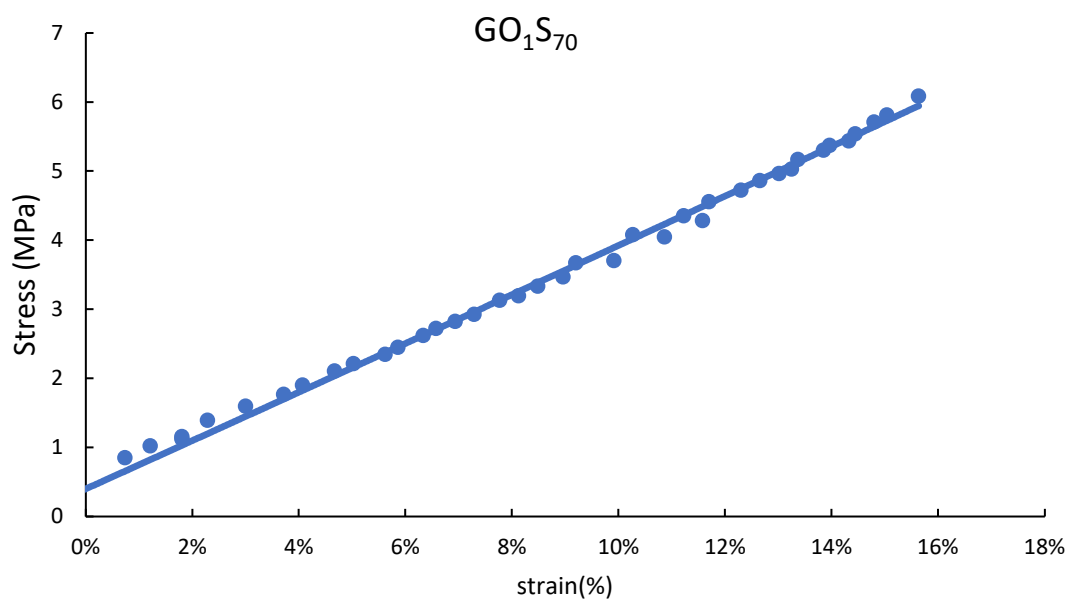

(Cont'd)

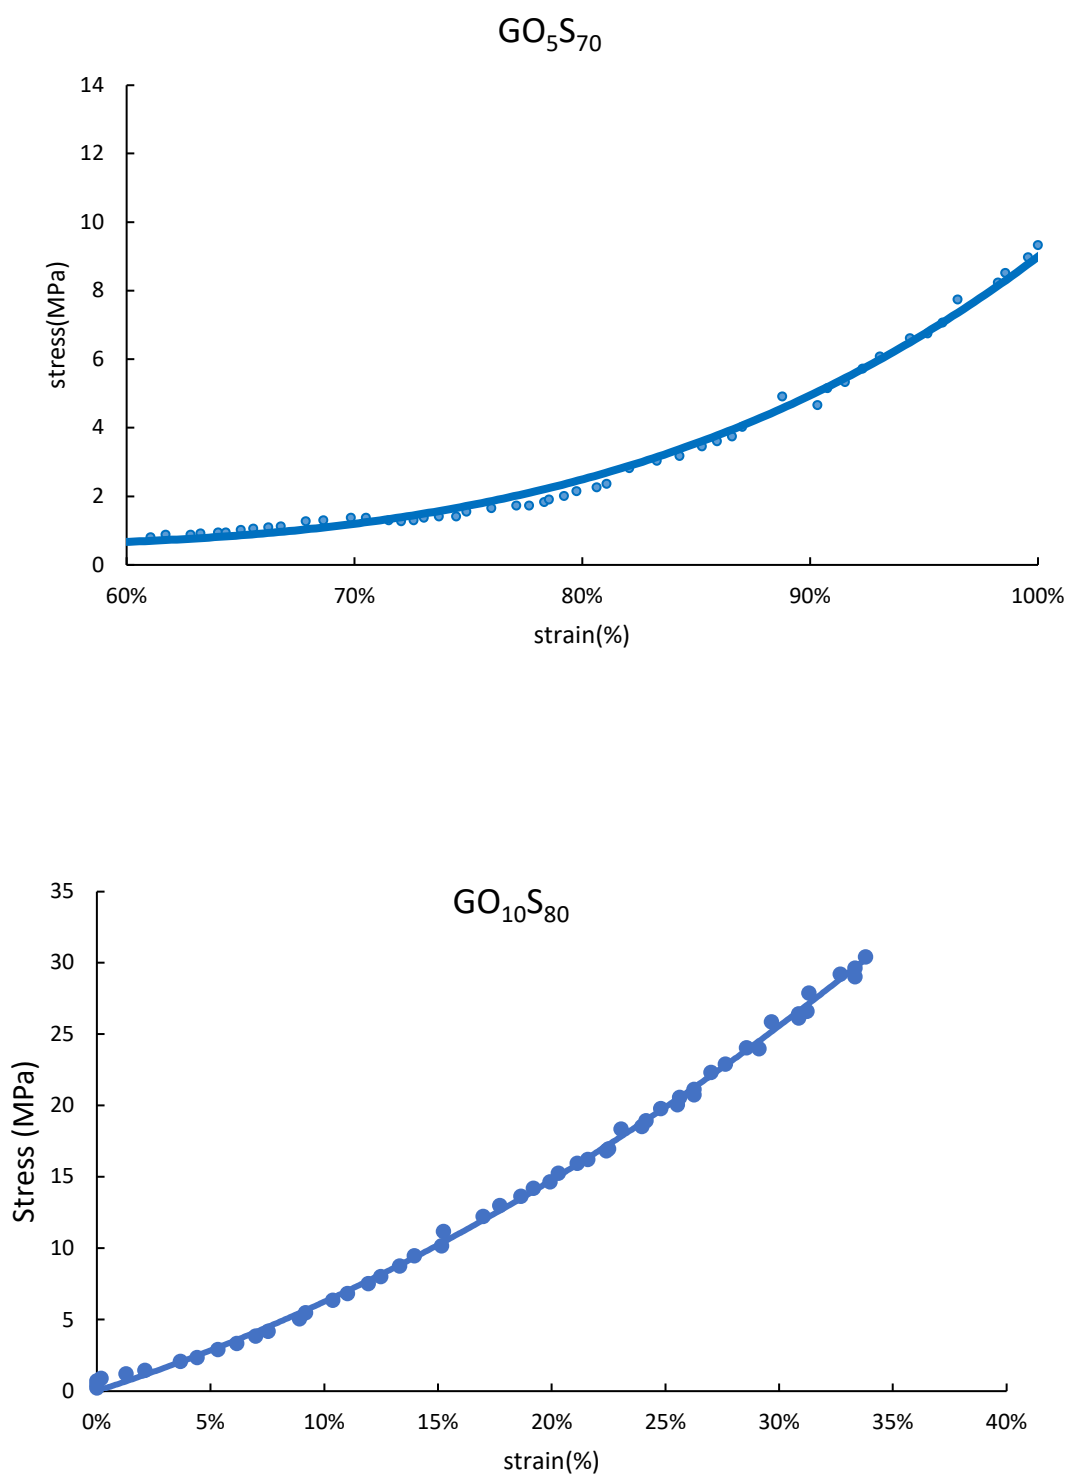

**Figure S3.** Representative stress-strain plots for compressive strength analysis of  $GL_xS_y$  and  $GO_xS_y$ .

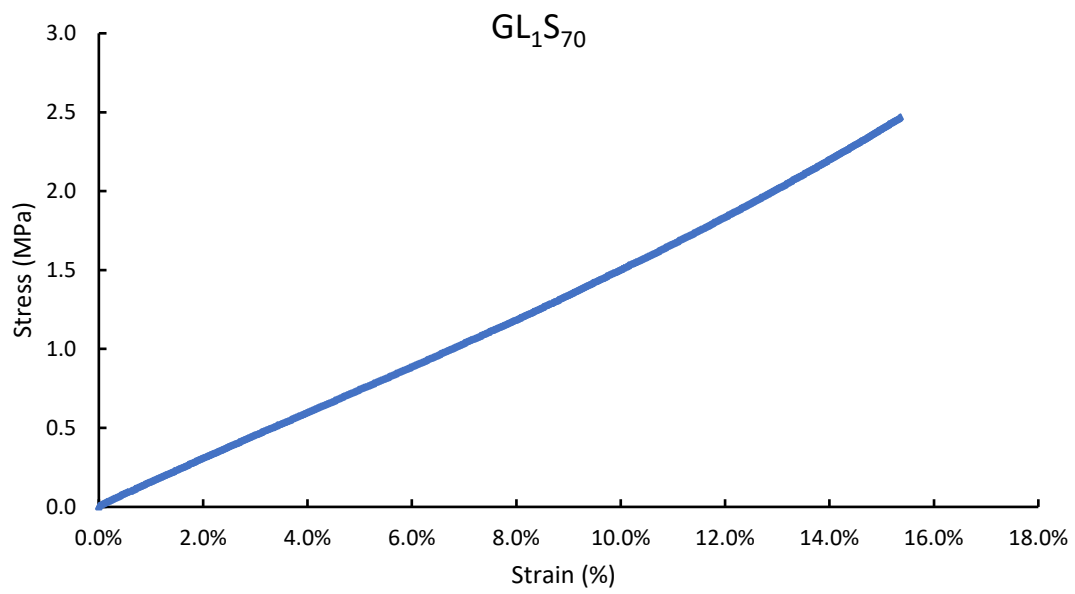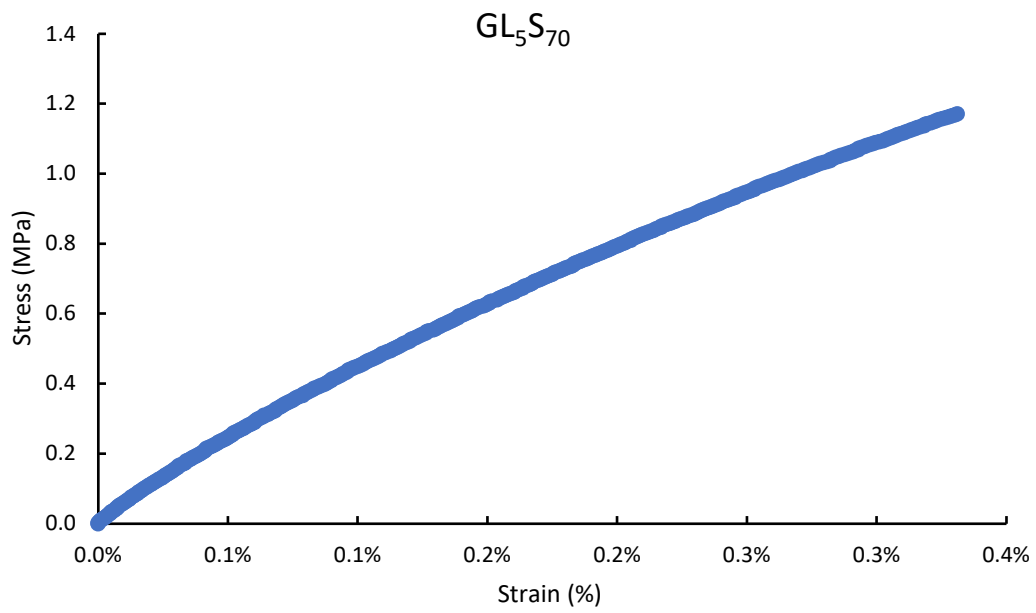

(Cont'd)

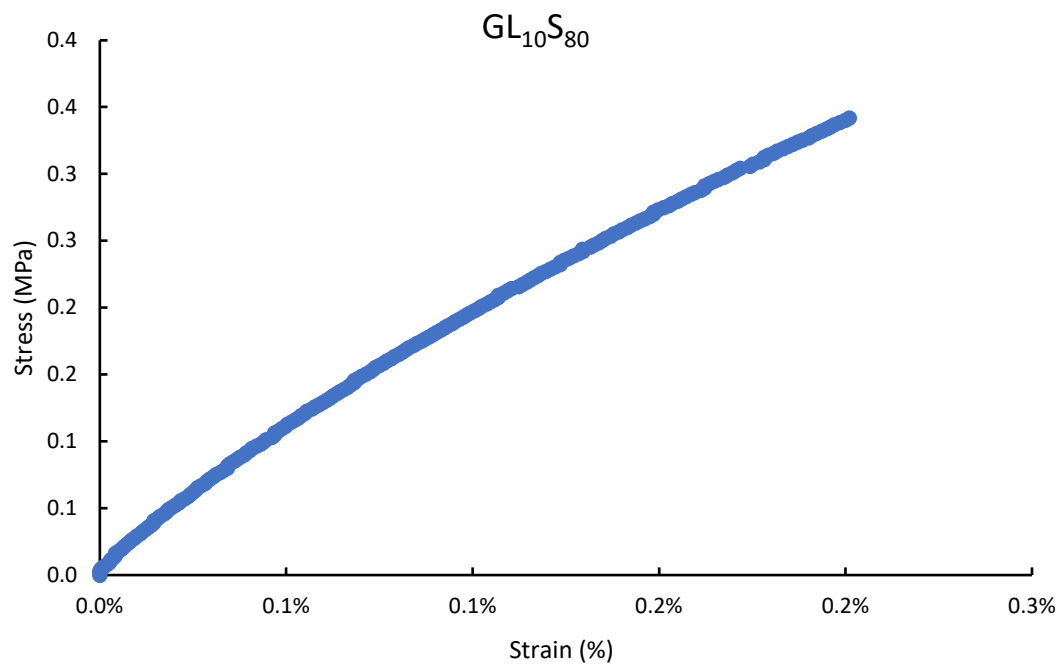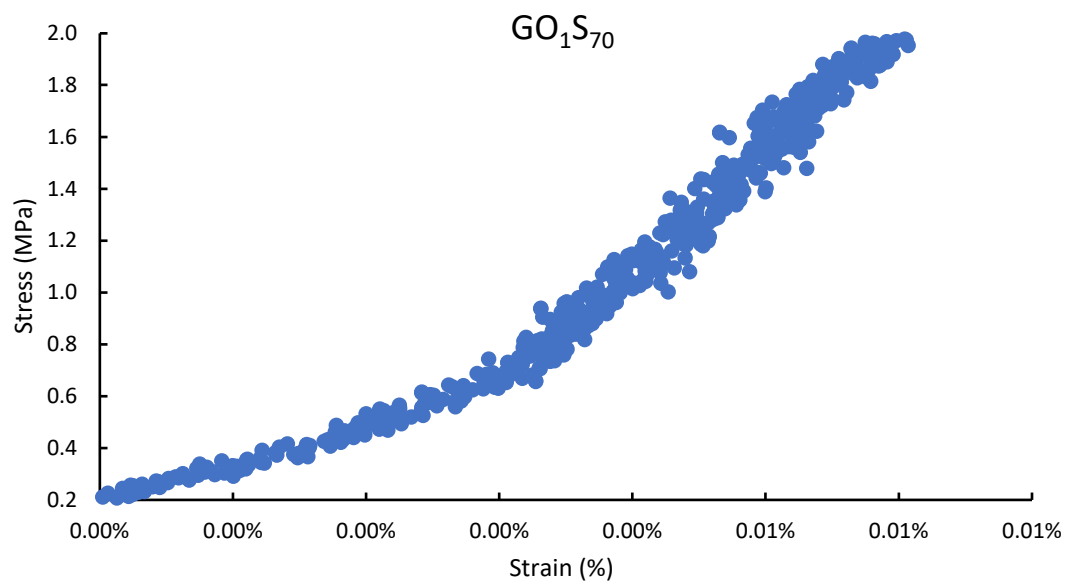

(Cont'd)



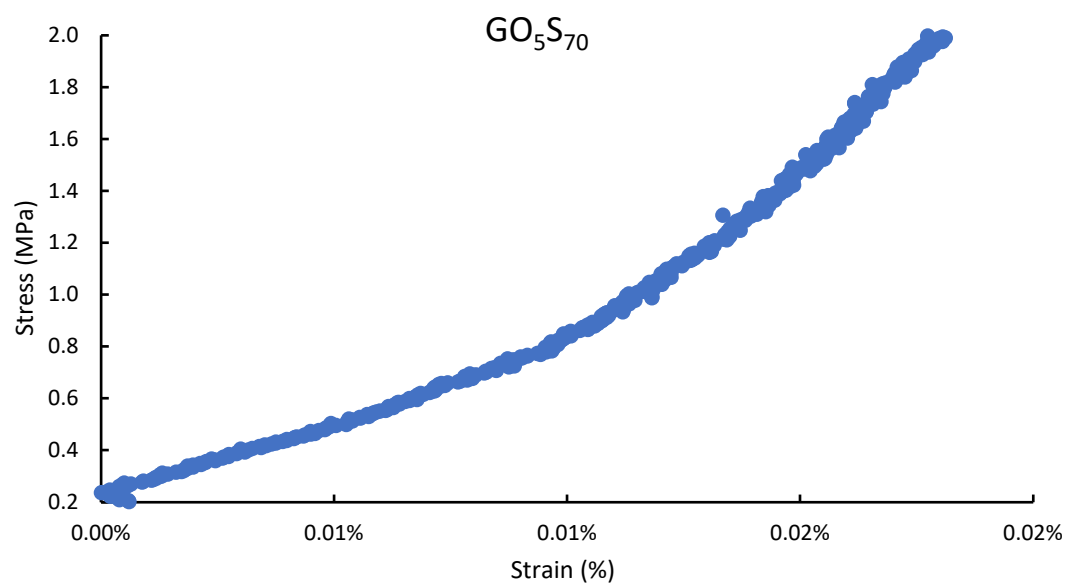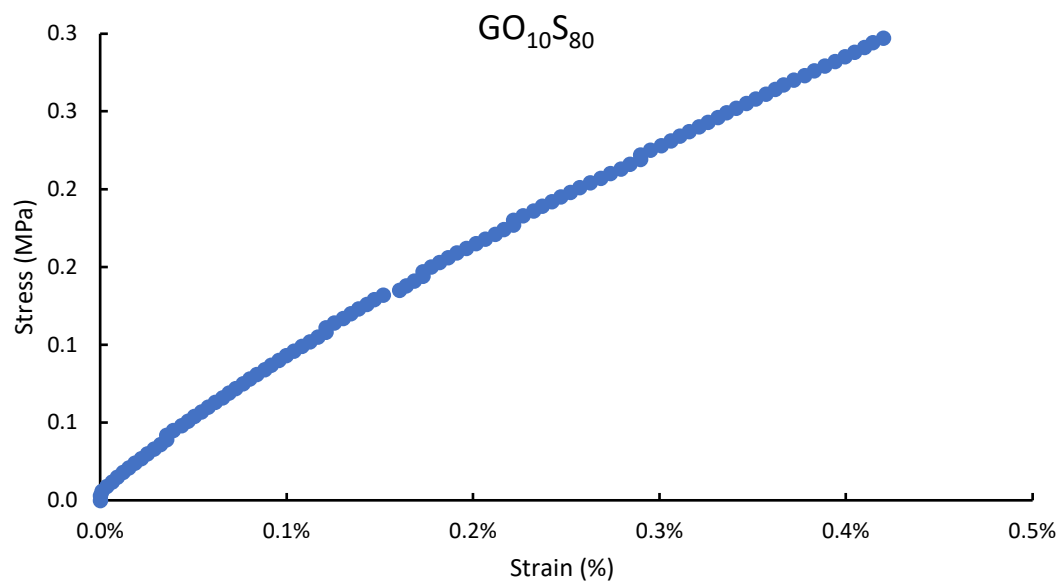

**Figure S4.** Representative stress-strain plots for flexural strength analysis of GL<sub>x</sub>S<sub>y</sub> and GO<sub>x</sub>S<sub>y</sub>.
